# Supplementary material
Source: PubMed Central journal article supplement (PMC11114644)
Supplement: 18_2012_983_MOESM1_ESM.pdf [file 18_2012_983_MOESM1_ESM.pdf]

## **SUPPLEMENTARY MATERIALS**

**The p38 $\alpha$  MAPK positively regulates osteoblast function and postnatal bone acquisition**

Journal of Cellular and Molecular Life Sciences

**Cyril Thouverey, Joseph Caverzasio**

Service of Bone Diseases, Department of Internal Medicine, University Hospital of Geneva,  
Geneva, Switzerland

**Corresponding author:**

Prof. Joseph Caverzasio

Service of Bone Diseases, Department of Internal Medicine, University Hospital of Geneva

64 Avenue de la Roseiraie, 1205 Geneva, Switzerland

Tel. +41 22 372 99 64, E-Mail [Joseph.Caverzasio@unige.ch](mailto:Joseph.Caverzasio@unige.ch)

**Supplementary materials:** 3 figures + 2 tables

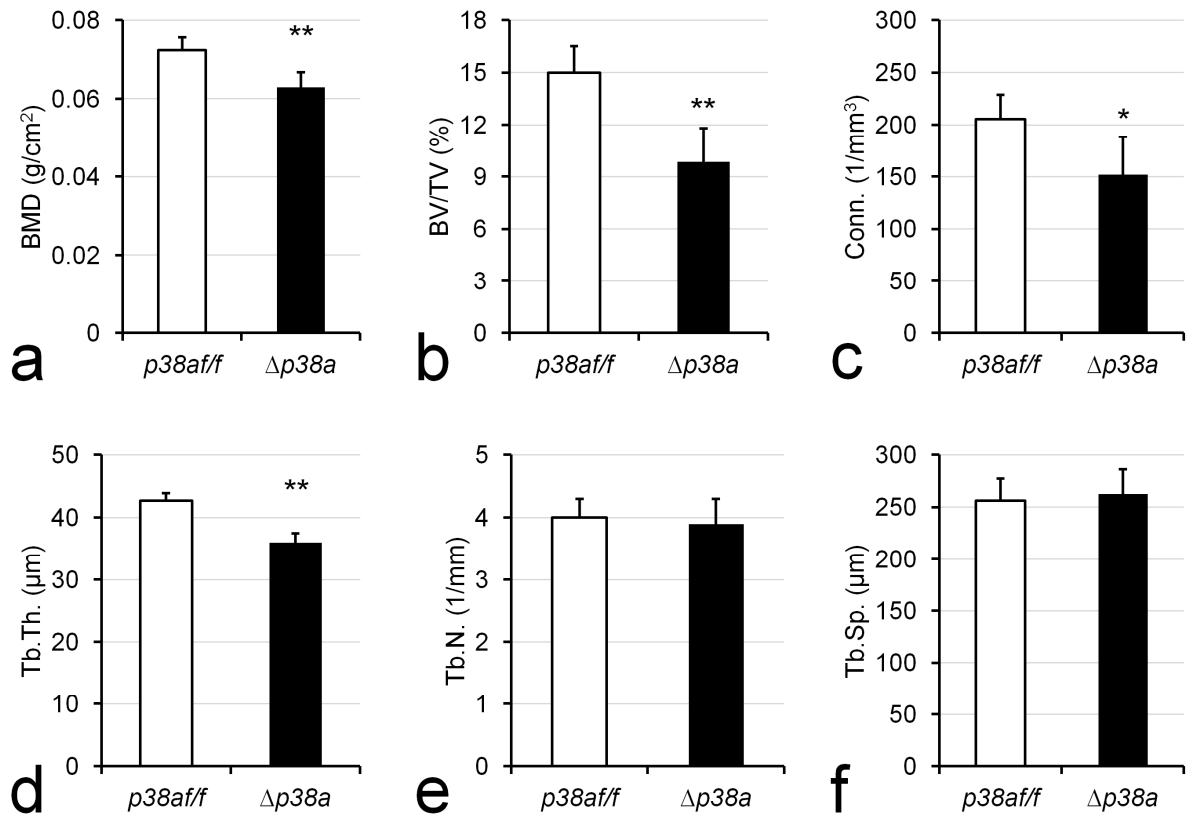

**Fig. S1** Decreased bone mineral density and altered microarchitecture of the 5<sup>th</sup> lumbar vertebra of  $\Delta p38a$  mice. (a) Lumbar BMD of *p38a<sup>ff</sup>* and  $\Delta p38a$  female mice at 12 weeks of age. (b-f) Trabecular bone microarchitecture was measured at the 5<sup>th</sup> lumbar vertebra of female *p38a<sup>ff</sup>* and  $\Delta p38a$  mice at 12 weeks of age.  $\mu$ CT parameters include (b) BV/TV: bone volume/total volume, (c) Conn: connectivity, (d) Tb.Th.: trabecular thickness, (e) Tb.N.: trabecular number, (f) Tb.Sp.: trabecular separation.. \* p<0.05, \*\* p≤0.01.

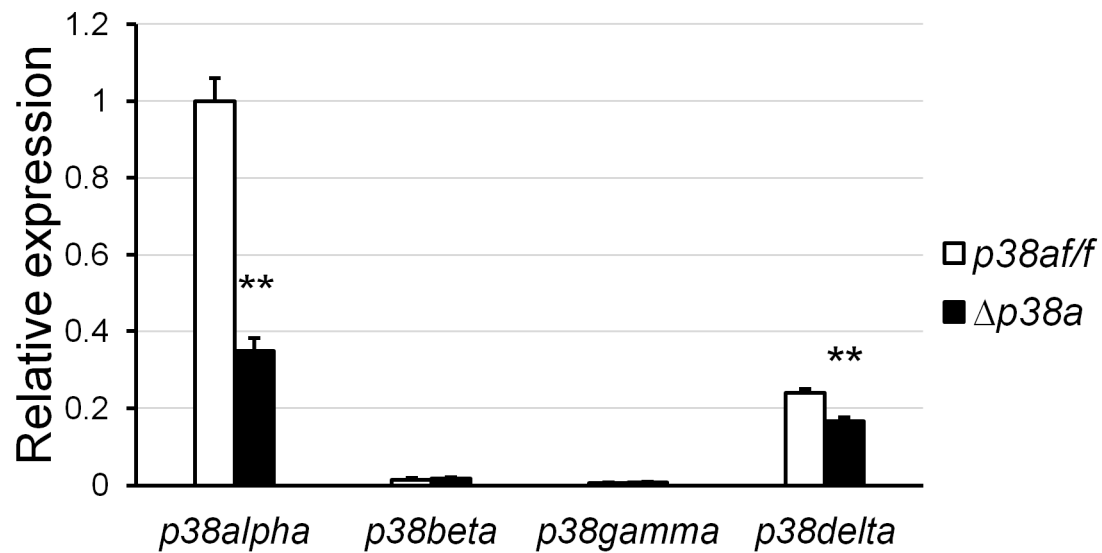

**Fig. S2** No compensation of *p38alpha* deletion in osteoblasts by *p38beta*, *p38gamma* and *p38delta* expressions. Primary osteoblasts were isolated from long bones of *p38af/f* and  $\Delta p38a$  mice and cultured for 10 days in osteogenic medium. Expressions of the different p38 members were assessed by real-time PCR. \*\*  $p \leq 0.01$ .

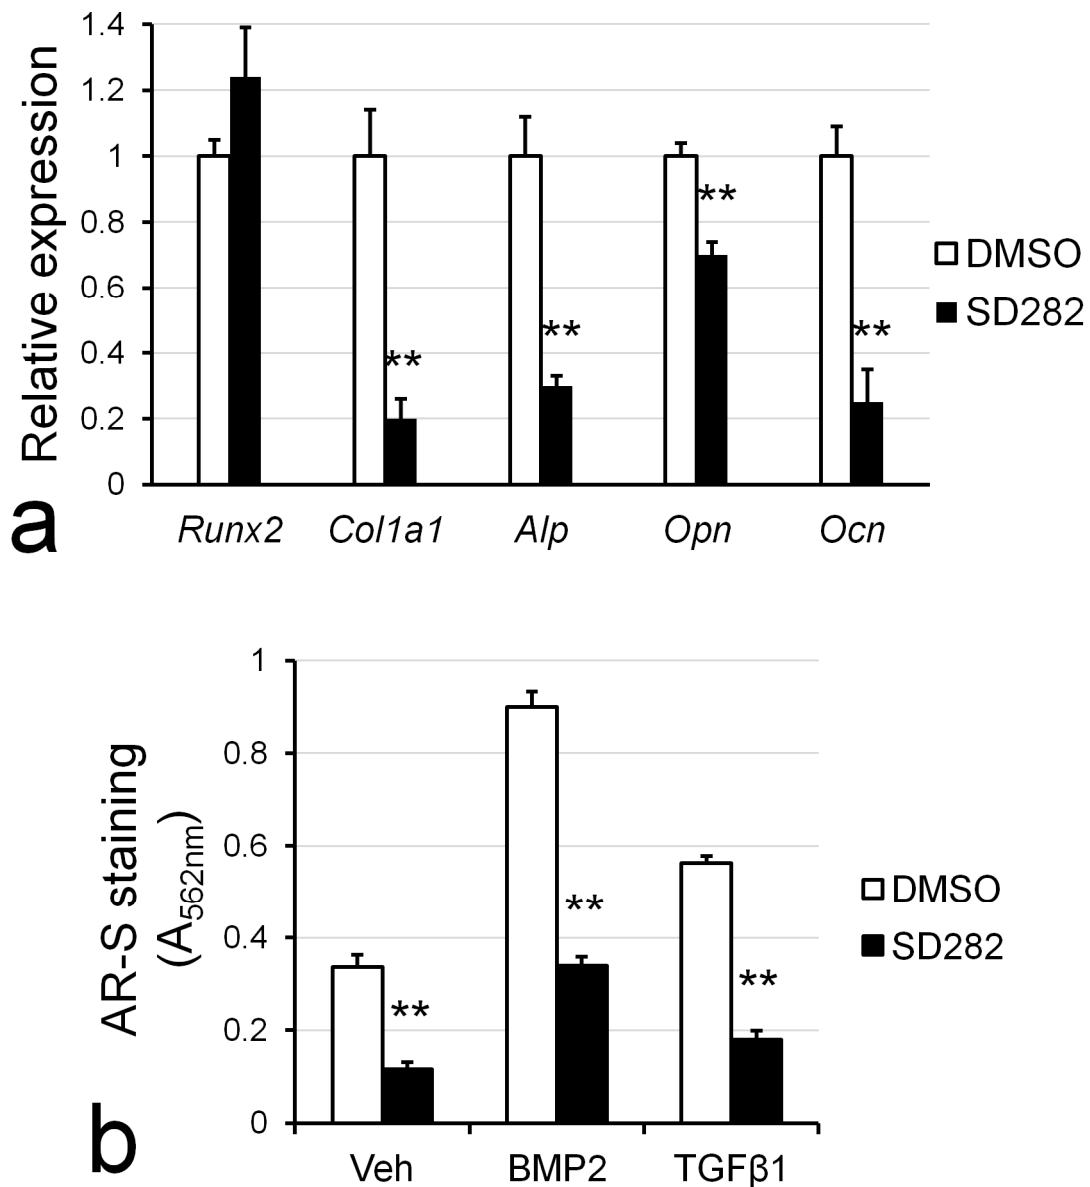

**Fig. S3** A selective p38 $\alpha$  inhibitor inhibits osteoblast function *in vitro*. (a,b) Primary osteoblasts were isolated from wild type mice and cultured in the absence (vehicle: DMSO) or presence of 10  $\mu$ M SD282, a selective p38 $\alpha$  inhibitor. (a) Osteoblast marker gene expression was assessed by real-time PCR after 7 days of culture in osteogenic medium. (b) Quantification of matrix mineralization was evaluated by AR-S staining after 14 days of culture in osteogenic medium supplemented with vehicle, TGF $\beta$ 1 (5 ng/mL) or BMP2 (50 ng/mL). \*\*  $p \leq 0.01$ .

**Table S1** SYBR Green primers for real-time PCR.

| <b>Gene</b>   |   | <b>Sequence</b>           | <b>Location</b> | <b>Length</b> | <b>%GC</b> | <b>Tm</b> | <b>Product length</b> |
|---------------|---|---------------------------|-----------------|---------------|------------|-----------|-----------------------|
| <i>B2m</i>    | F | CACTGACCGGCCTGTATGCT      | 41              | 20            | 60         | 60        | 87                    |
|               | R | GTATGTTTCGGCTTCCCATTCTC   | 127             | 22            | 50         | 59        |                       |
| <i>p38a</i>   | F | CGCAAGGTCACTGGAGGAAT      | 276             | 20            | 55         | 59        | 83                    |
|               | R | GGCACTTCACGATGTTGTTTCAG   | 358             | 22            | 50         | 59        |                       |
| <i>p38b</i>   | F | GTCCTGAGGTTCTGGCAAAGAT    | 728             | 22            | 50         | 58        | 70                    |
|               | R | GGCATGGGAGGCAGAGACT       | 797             | 19            | 63         | 59        |                       |
| <i>p38g</i>   | F | ACGAGAACGTCATTGGGCTACT    | 248             | 22            | 50         | 59        | 81                    |
|               | R | GCATCACCAGGTAGAAGTCTGTGA  | 328             | 24            | 50         | 59        |                       |
| <i>p38d</i>   | F | AGTCGACATCTGGTCTGTTGGTT   | 609             | 23            | 48         | 59        | 89                    |
|               | R | TCAGCTGGTCCAGGTAGTCCTT    | 697             | 22            | 55         | 59        |                       |
| <i>Runx2</i>  | F | CGGACGAGGCAAGAGTTTCA      | 798             | 20            | 55         | 60        | 100                   |
|               | R | GGGACCGTCCACTGTCACTT      | 897             | 20            | 60         | 58        |                       |
| <i>Colla1</i> | F | CTGGCCTTGGAGGAAACTTT      | 428             | 20            | 50         | 57        | 72                    |
|               | R | GCACGGAAACTCCAGCTGAT      | 499             | 20            | 55         | 59        |                       |
| <i>Alp</i>    | F | AGATGGCCTGGATCTCATCAGT    | 741             | 22            | 50         | 59        | 83                    |
|               | R | G TTCAGTGC GGTTC CAGACATA | 823             | 22            | 50         | 59        |                       |
| <i>Opn</i>    | F | CGAGGTGATAGCTTGGCTTATG    | 430             | 22            | 50         | 58        | 119                   |
|               | R | GACTCACCGCTCTTCATGTGA     | 548             | 21            | 52         | 57        |                       |
| <i>Ocn</i>    | F | GGAGGGCAATAAGGTAGTGAACAG  | 114             | 24            | 50         | 59        | 110                   |
|               | R | CACAAGCAGGGTTAAGCTCACA    | 223             | 22            | 50         | 59        |                       |
| <i>Rankl</i>  | F | GCACACCTCACCATCAATGC      | 493             | 20            | 55         | 59        | 82                    |
|               | R | AGCCTCGATCGTGGTACCAA      | 574             | 20            | 55         | 59        |                       |
| <i>Opg</i>    | F | GACAACGTGTGTTCCGGAAA      | 544             | 20            | 50         | 58        | 96                    |
|               | R | GGTAGGAACAGCAAACCTGAAGA   | 639             | 23            | 48         | 58        |                       |

**Table S2** Femoral bone microarchitecture of 12-week-old  $p38\alpha^{ff}$  and  $\Delta p38a$  female and male mice.

| Parameters    |                          | $p38\alpha^{ff}$ | $\Delta p38a$ | p value | $\Delta$ (%) |
|---------------|--------------------------|------------------|---------------|---------|--------------|
| <b>Female</b> |                          | n=6              | n=6           |         |              |
| Total         | BMD (g/cm <sup>2</sup> ) | 0.079 ± 0.004    | 0.069 ± 0.004 | 0.001   | -13.30%      |
| Cortical      | TV (mm <sup>3</sup> )    | 1.12 ± 0.03      | 1.16 ± 0.09   | 0.36    | -            |
|               | BV (mm <sup>3</sup> )    | 0.46 ± 0.01      | 0.36 ± 0.02   | 0.001   | -20.00%      |
|               | BMaV (mm <sup>3</sup> )  | 0.66 ± 0.02      | 0.78 ± 0.08   | 0.03    | 18.00%       |
|               | Ct.Th. (μm)              | 171.2 ± 3.7      | 136.6 ± 6.4   | 0.0001  | -20.00%      |
| Trabecular    | BV/TV (%)                | 9.0 ± 1.5        | 5.7 ± 0.6     | 0.002   | -37.90%      |
|               | Tb.Th. (μm)              | 49.4 ± 2.0       | 39.1 ± 2.4    | 0.0001  | -20.70%      |
|               | Tb.N. (1/mm)             | 4.1 ± 0.3        | 3.9 ± 0.3     | 0.11    | -            |
|               | Tb.Sp. (μm)              | 248.4 ± 20.0     | 260.9 ± 20.6  | 0.21    | -            |
| <b>Male</b>   |                          | n=4              | n=4           |         |              |
| Total         | BMD (g/cm <sup>2</sup> ) | 0.092 ± 0.008    | 0.082 ± 0.003 | 0.007   | -11.30%      |
| Cortical      | TV (mm <sup>3</sup> )    | 1.25 ± 0.10      | 1.26 ± 0.03   | 0.72    | -            |
|               | BV (mm <sup>3</sup> )    | 0.52 ± 0.05      | 0.44 ± 0.03   | 0.02    | -16.20%      |
|               | BMaV (mm <sup>3</sup> )  | 0.74 ± 0.06      | 0.83 ± 0.03   | 0.02    | 13.70%       |
|               | Ct.Th. (μm)              | 173.2 ± 5.9      | 141.0 ± 9.5   | 0.002   | -18.60%      |
| Trabecular    | BV/TV (%)                | 15.9 ± 3.0       | 11.1 ± 2.1    | 0.04    | -30.20%      |
|               | Tb.Th. (μm)              | 49.2 ± 4.2       | 41.8 ± 3.6    | 0.04    | -15.00%      |
|               | Tb.N. (1/mm)             | 5.1 ± 0.1        | 4.9 ± 0.3     | 0.27    | -            |
|               | Tb.Sp. (μm)              | 189.4 ± 6.0      | 203.1 ± 15.2  | 0.17    | -            |

μCT analyses were performed at femoral midshaft (cortical) and distal femur (trabecular) of control ( $p38\alpha^{ff}$ ) and mutant ( $\Delta p38a$ ) mice.

BMD: bone mineral density; TV: total volume; BV: bone volume; BMaV: bone marrow volume; Tb.Th.: trabecular thickness; Tb.N.: trabecular number; Tb.Sp.: trabecular separation.

Data are expressed as mean ± SD. p values were determined using unpaired *t* tests. Significant differences are expressed as percentage.
